# Supplementary material
Source: PubMed Central journal article supplement (PMC9859753)

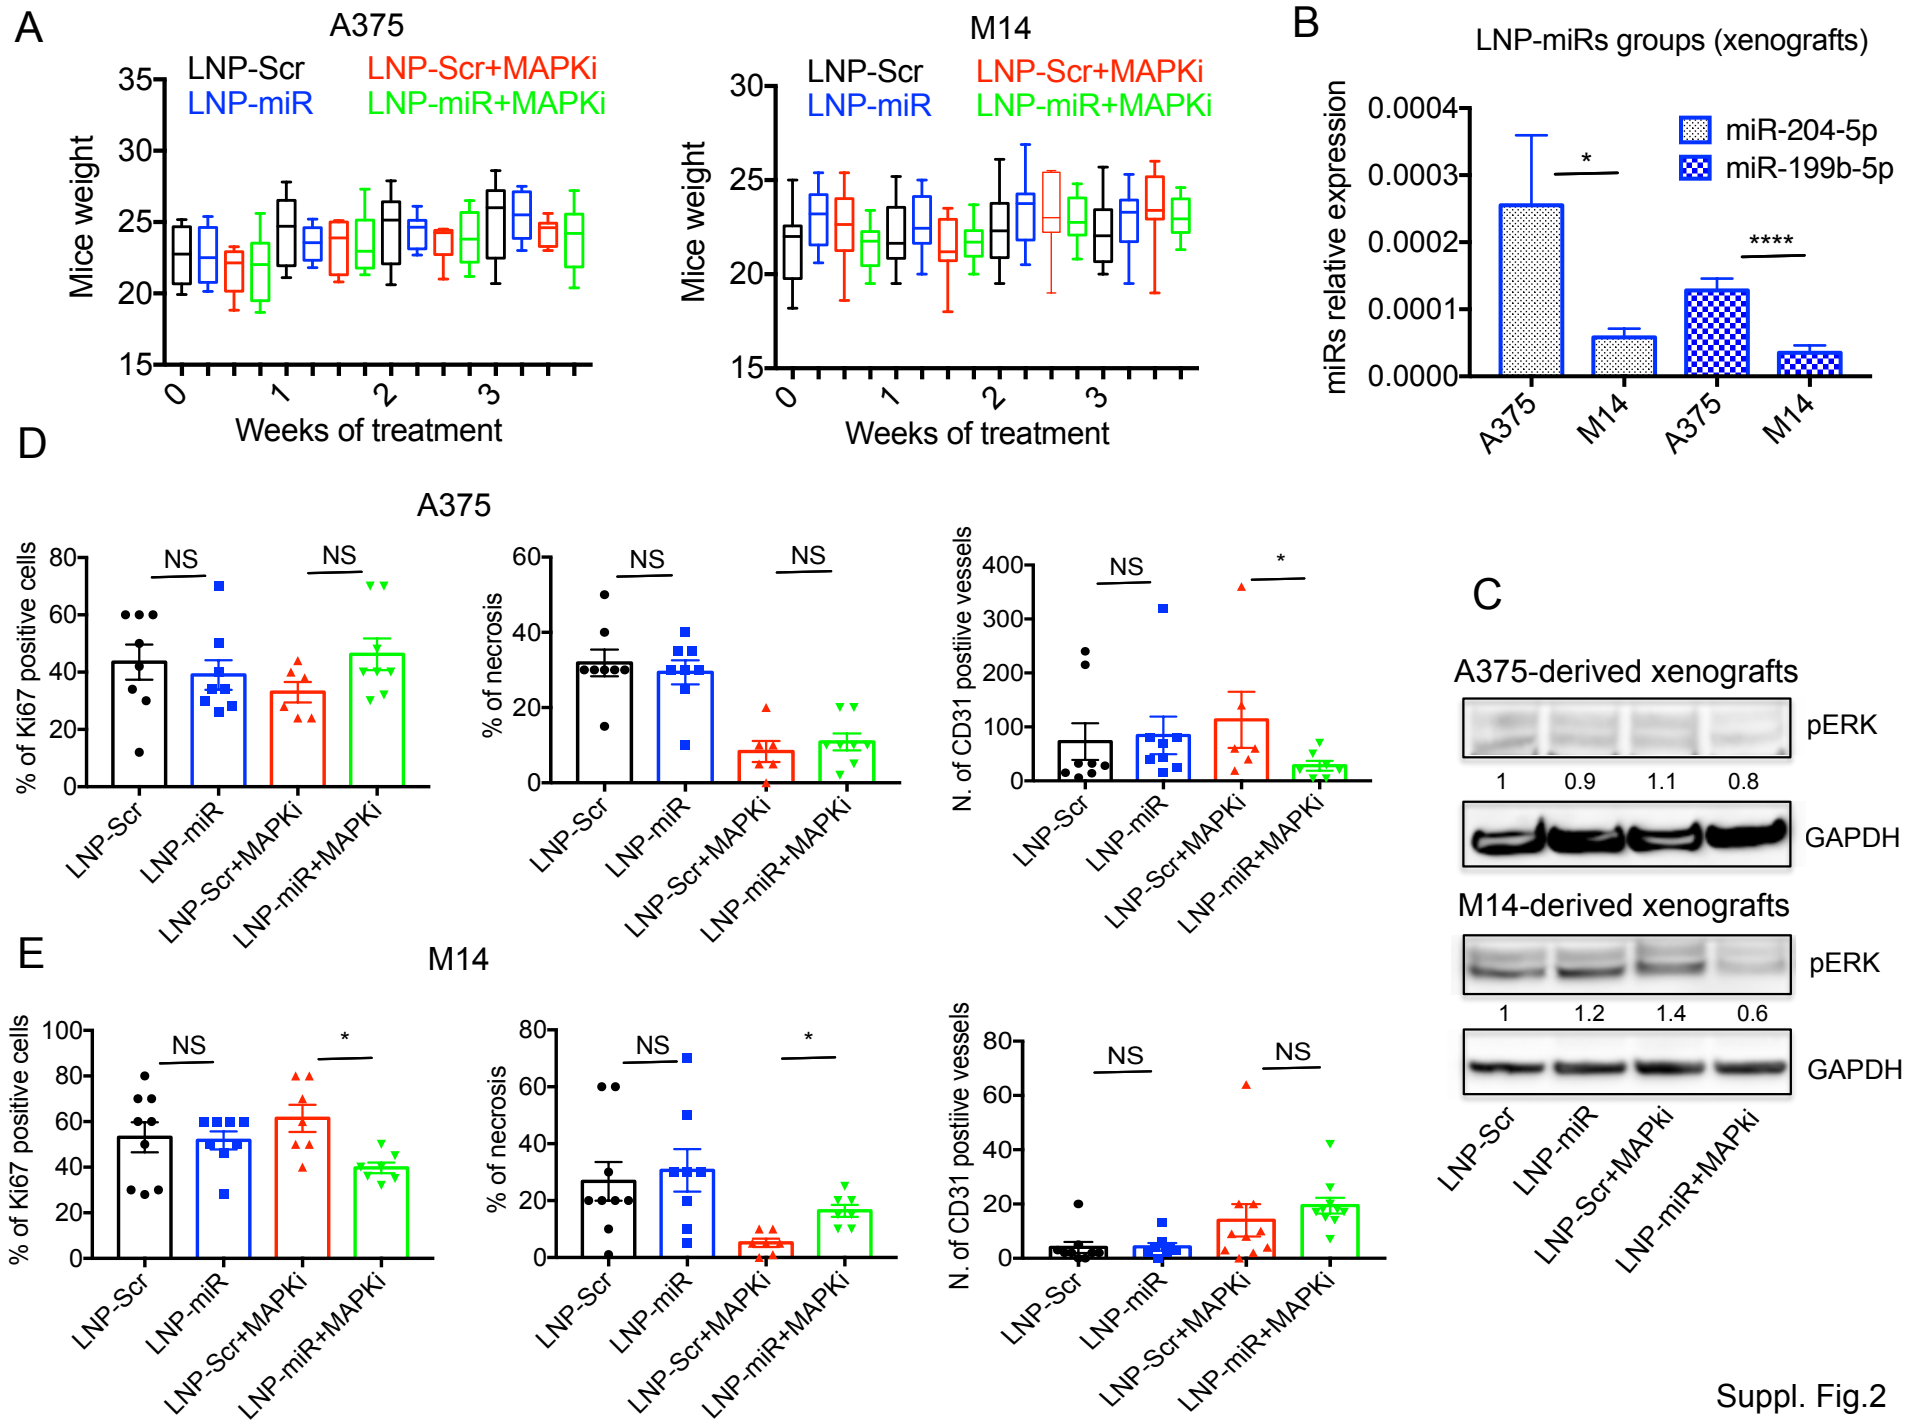

Supplement: 41388_2022_2547_MOESM4_ESM.pdf [file 41388_2022_2547_MOESM4_ESM.pdf]
