# Supplementary material
Source: PubMed Central journal article supplement (PMC9859753)
Supplement: 41388_2022_2547_MOESM7_ESM.pdf [file 41388_2022_2547_MOESM7_ESM.pdf]

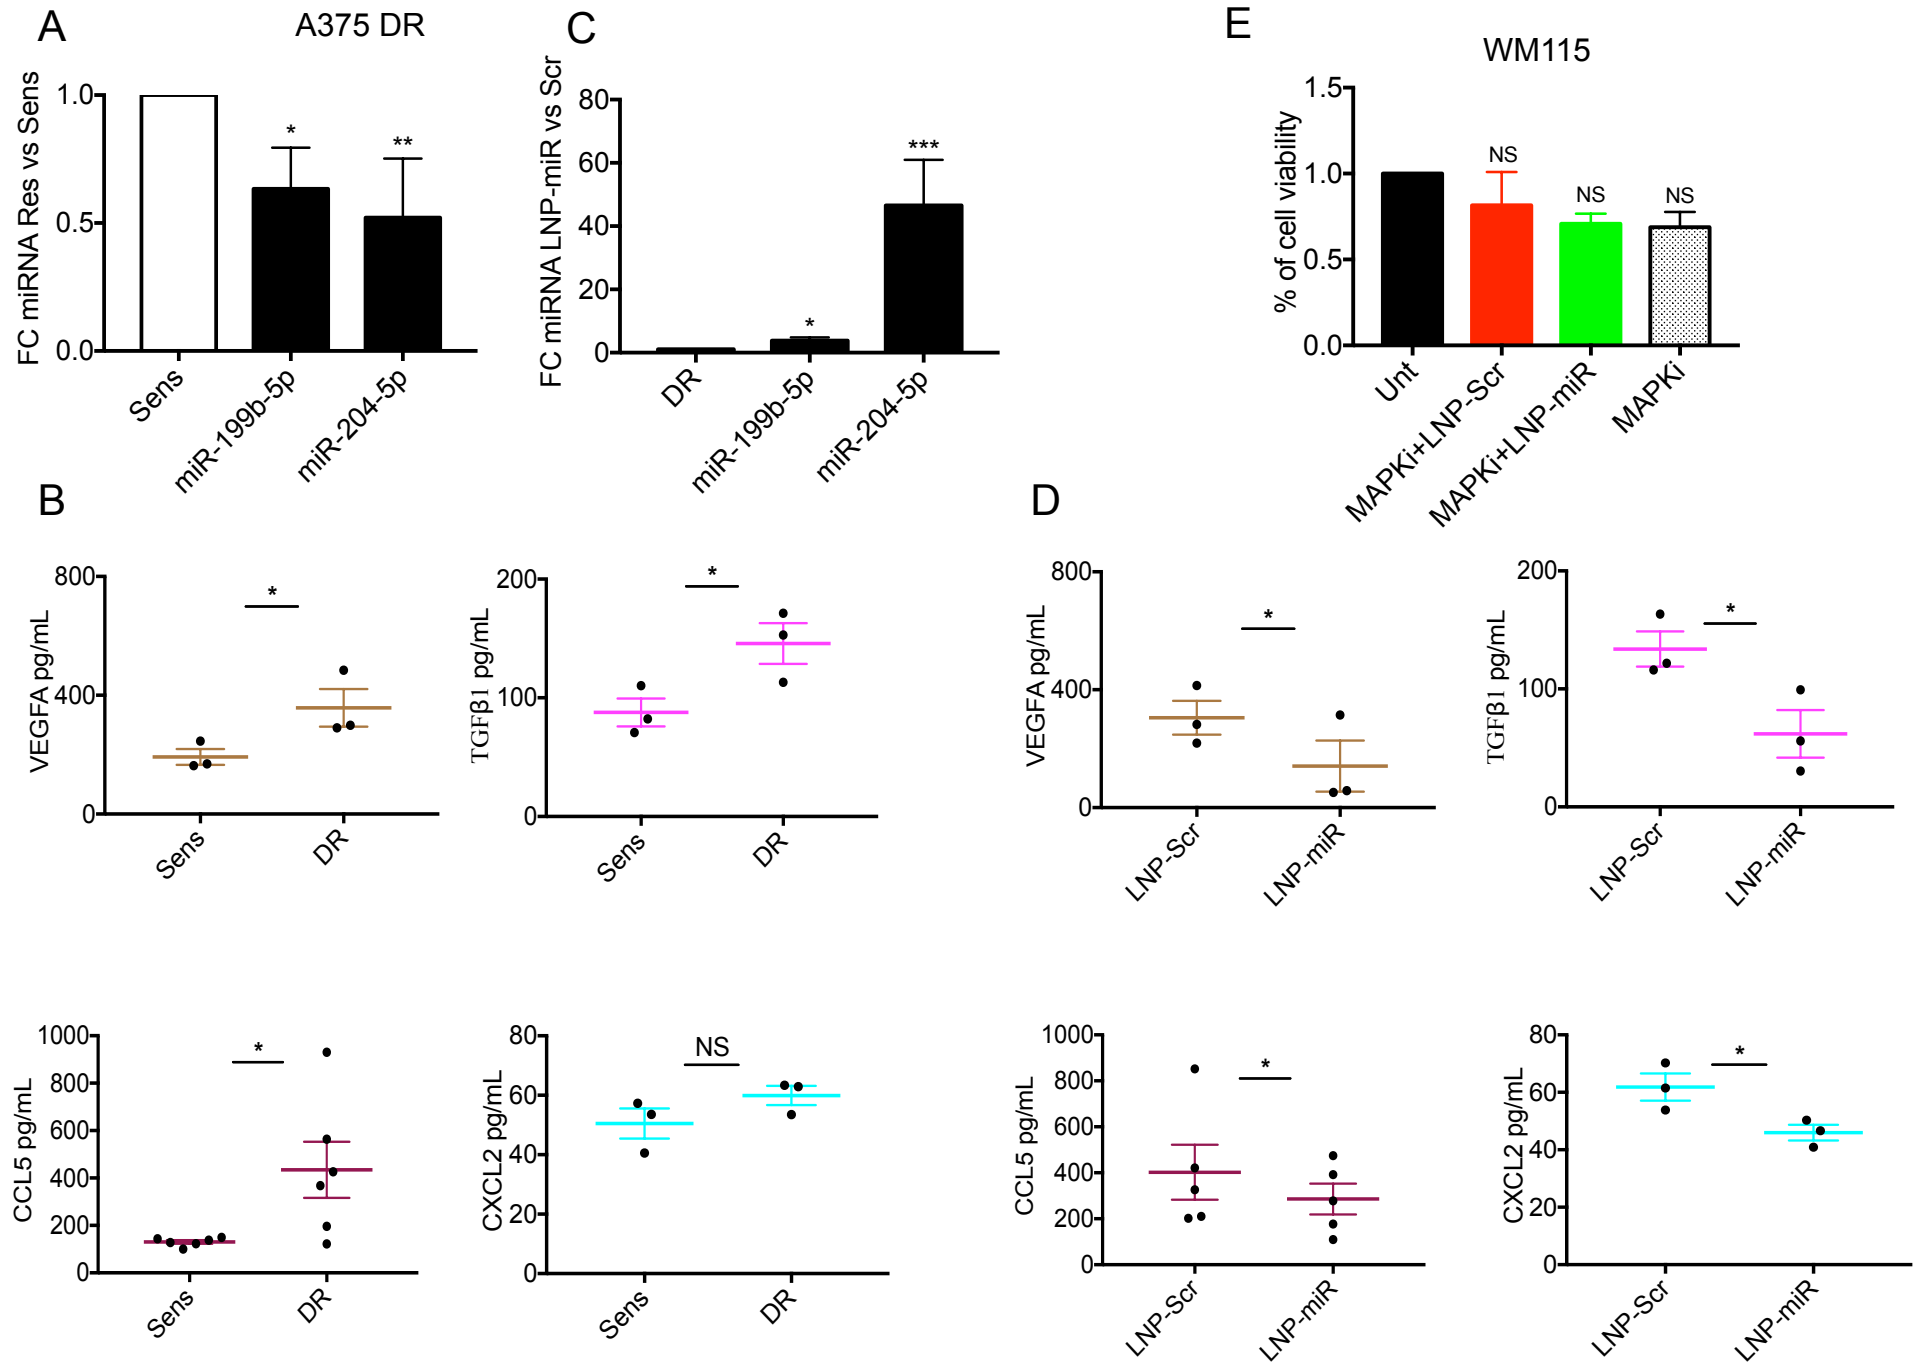

Suppl. Fig.5
