# Supplementary material
Source: PubMed Central journal article supplement (PMC9859753)

SKCM (n=471)

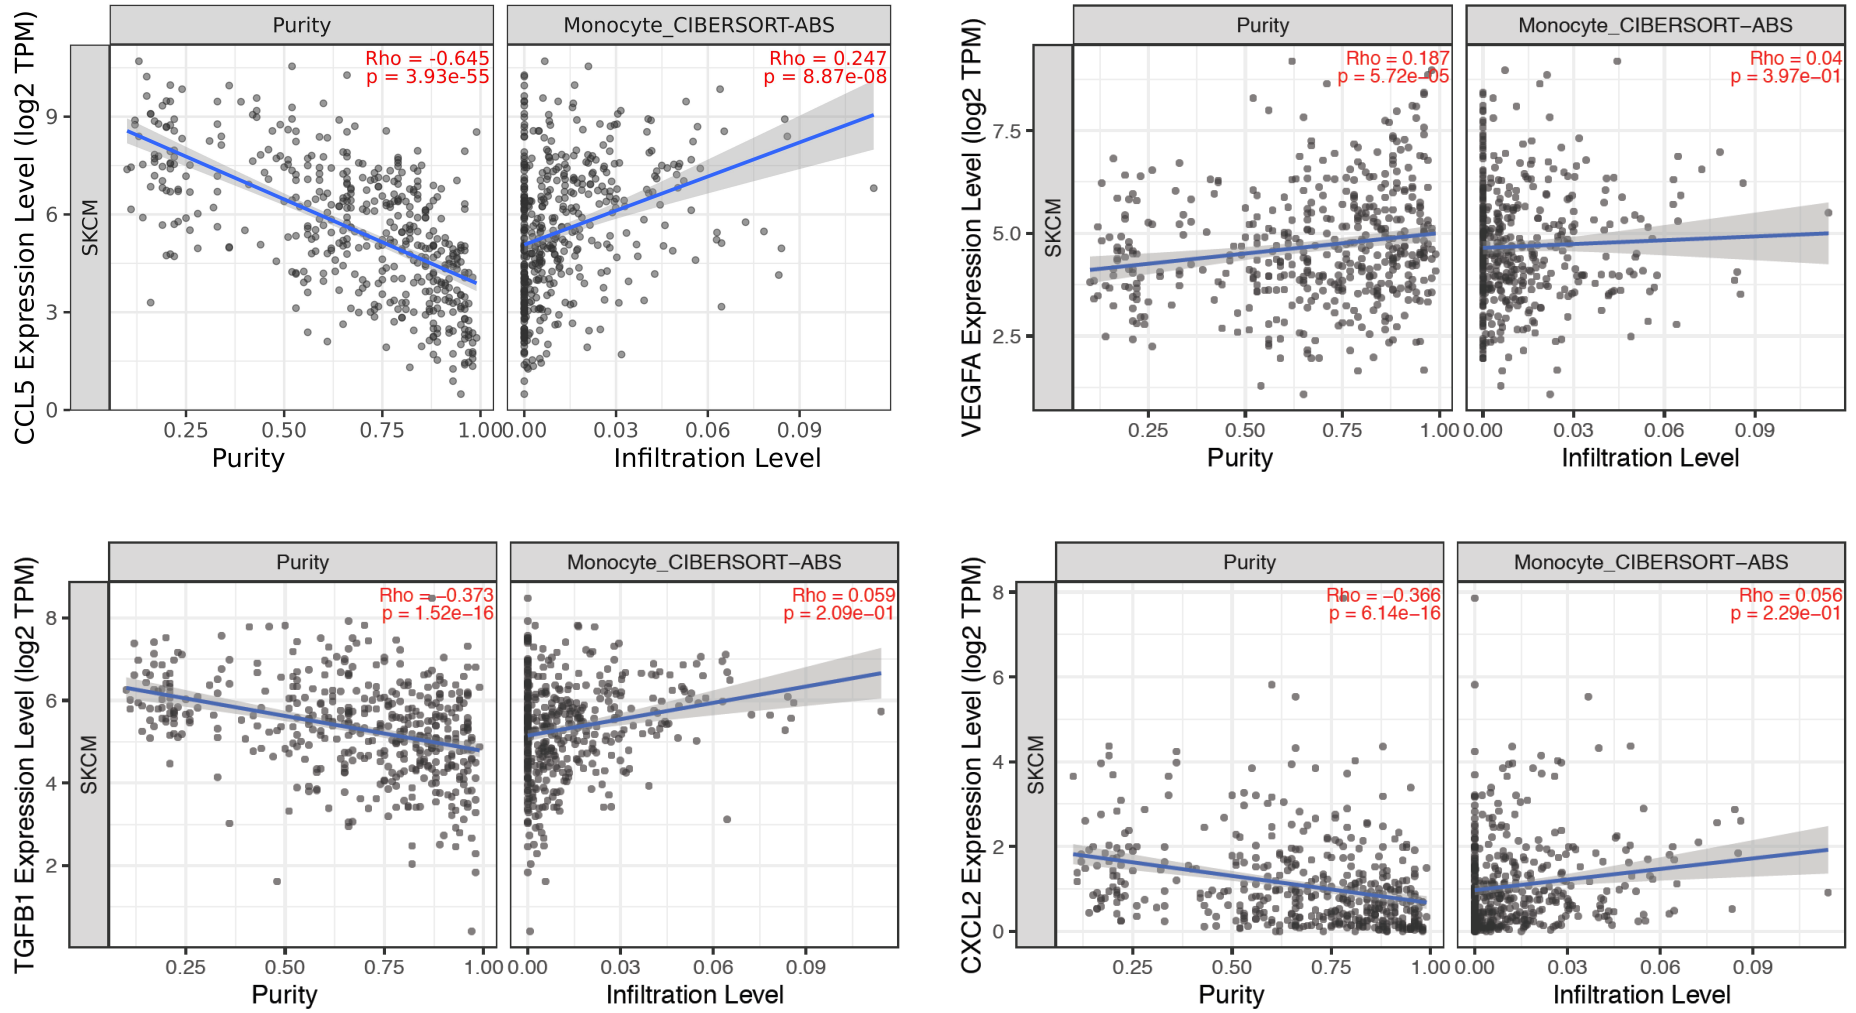

Supplement: 41388_2022_2547_MOESM8_ESM.pdf [file 41388_2022_2547_MOESM8_ESM.pdf]
