# Supplementary material
Source: PubMed Central journal article supplement (PMC9859753)

F4/80 IHC (A375)

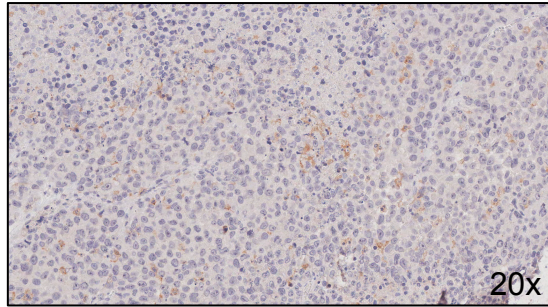

LNP-Scr

F4/80 IHC (M14)

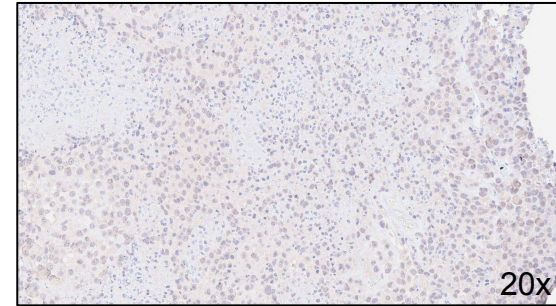

LNP-miR

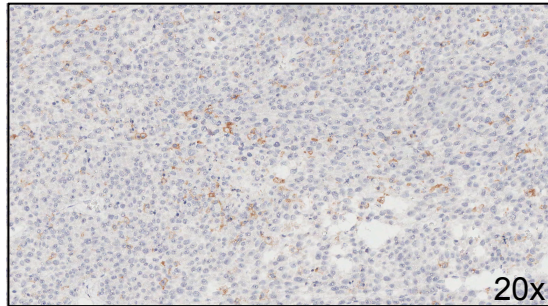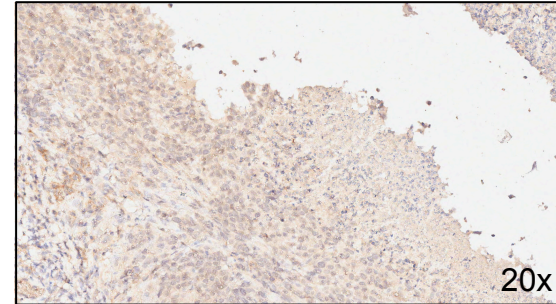

LNP-Scr+MAPKi

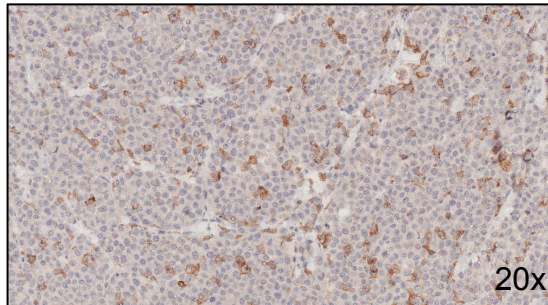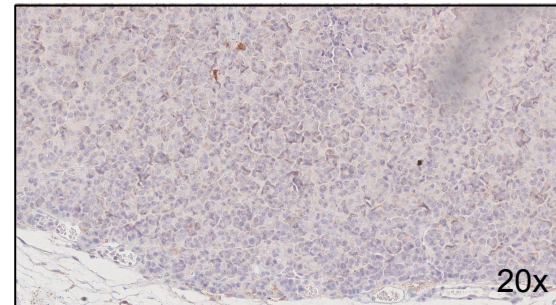

LNP-miR+MAPKi

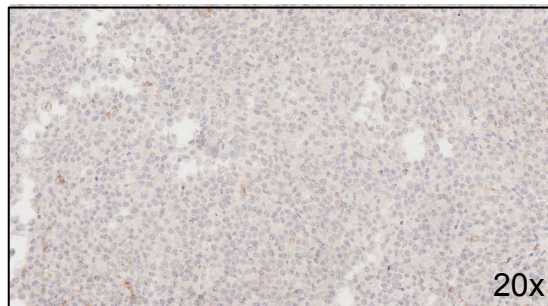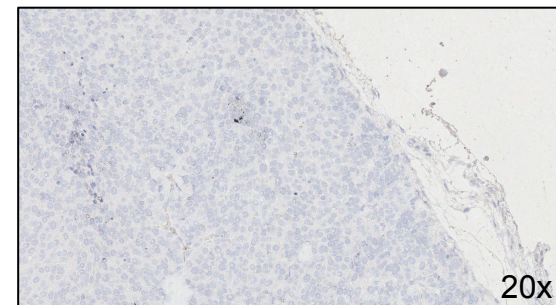

Supplement: 41388_2022_2547_MOESM9_ESM.pdf [file 41388_2022_2547_MOESM9_ESM.pdf]
