# Supplementary material
Source: PubMed Central journal article supplement (PMC9859753)

A

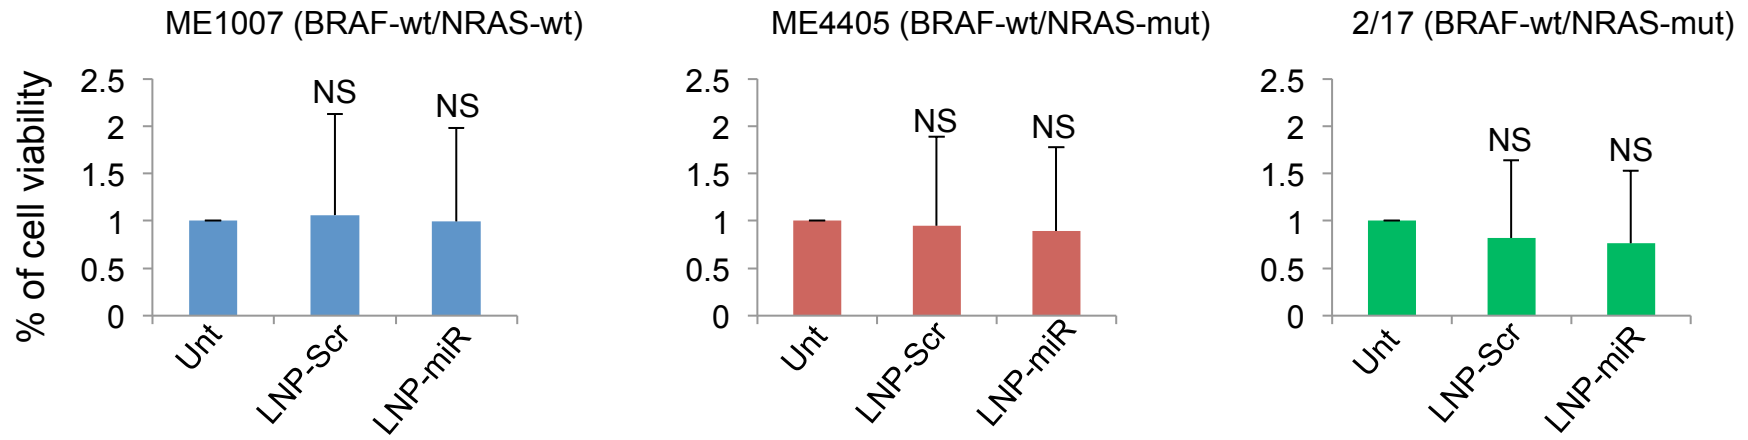

B

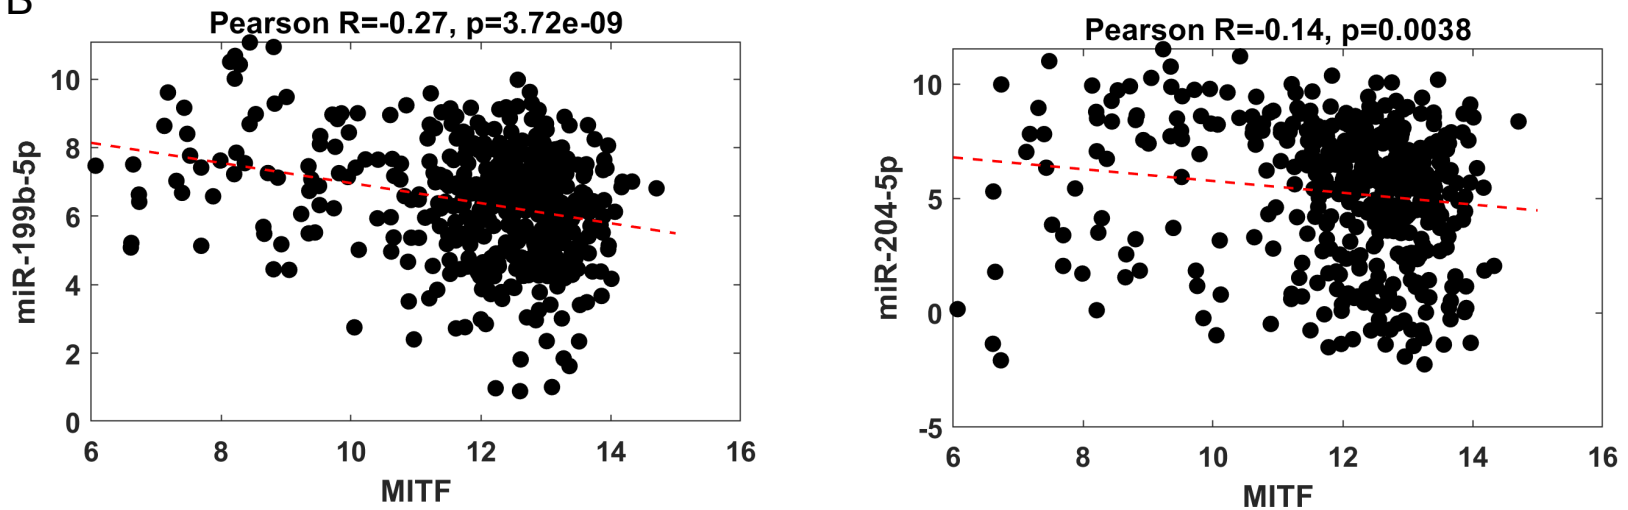

Supplement: 41388_2022_2547_MOESM12_ESM.pdf [file 41388_2022_2547_MOESM12_ESM.pdf]
